# Supplementary material for: Air Quality Assessment along China-Pakistan Economic Corridor at the Confluence of Himalaya-Karakoram-Hindukush
Source: MDPI journal article supplement (doi:10.3390/atmos13121994), 2022-11-28
Supplement: s1 [file s1]

Archive with 1 entries (1 files):
- atmosphere-2009057-supplementary.pdf
