# Supplementary material for: Air Quality Assessment along China-Pakistan Economic Corridor at the Confluence of Himalaya-Karakoram-Hindukush
Source: MDPI journal article supplement (doi:10.3390/atmos13121994), 2022-11-28
Supplement: s1 [file s1 › atmosphere-2009057-supplementary.pdf]

# Supplementary Materials: Air Quality Assessment along China-Pakistan Economic Corridor at the Confluence of Himalaya-Karakoram-Hindukush

Maqbool Ahmad <sup>1</sup>, Khadim Hussain <sup>2</sup>, Jawad Nasir <sup>3</sup>, Zhongwei Huang <sup>4</sup>, Khan Alam <sup>4,5,\*</sup>, Samreen Liaquat <sup>2</sup>, Peng Wang <sup>6</sup>, Waqar Hussain <sup>2</sup>, Lyudmila Mihaylova <sup>7</sup>, Ajaz Ali <sup>2</sup> and Suhaib Bin Farhan <sup>3</sup>

**Table S1.** Duration of data according to local standard time (LST) for selected study locations.

| No | City   | Winter Season        |                       | Summer Season        |                       |
|----|--------|----------------------|-----------------------|----------------------|-----------------------|
|    |        | Start<br>(Date/Time) | Finish<br>(Date/Time) | Start<br>(Date/Time) | Finish<br>(Date/Time) |
| 1  | Sost   | 26-11-2019 1600hrs   | 27-11-2019 1500hrs    | 16-08-2020 1700hrs   | 17-08-2020 1400hrs    |
|    |        | 27-11-2019 1700hrs   | 28-11-2019 1600hrs    | 17-08-2020 1700hrs   | 18-08-2020 1500hrs    |
|    |        | 28-11-2019 1500hrs   | 30-11-2019 800hrs     | 18-08-2020 1800hrs   | 20-08-2020 1600hrs    |
| 2  | Hunza  | 30-11-2019 1900hrs   | 03-12-2019 1300hrs    | 20-08-2020 2000hrs   | 23-08-2020 1300hrs    |
|    |        | 03-12-2019 1500hrs   | 05-12-2019 1000hrs    | 23-08-2020 1400hrs   | 25-08-2020 1200hrs    |
| 3  | Gilgit | 05-12-2019 1500hrs   | 07-12-2019 1400hrs    | 25-08-2020 1600hrs   | 27-08-2020 1500hrs    |
|    |        | 07-12-2019 1600hrs   | 10-12-2019 1700hrs    | 27-08-2020 1800hrs   | 30-08-2020 500hrs     |
| 4  | Jaglot | 10-12-2019 1900hrs   | 15-12-2019 1100hrs    | 30-08-2020 2200hrs   | 04-09-2020 1100hrs    |
| 5  | Chilas | 15-12-2019 1700hrs   | 20-12-2019 0600hrs    | 04-09-2020 2000hrs   | 09-09-2020 1200hrs    |

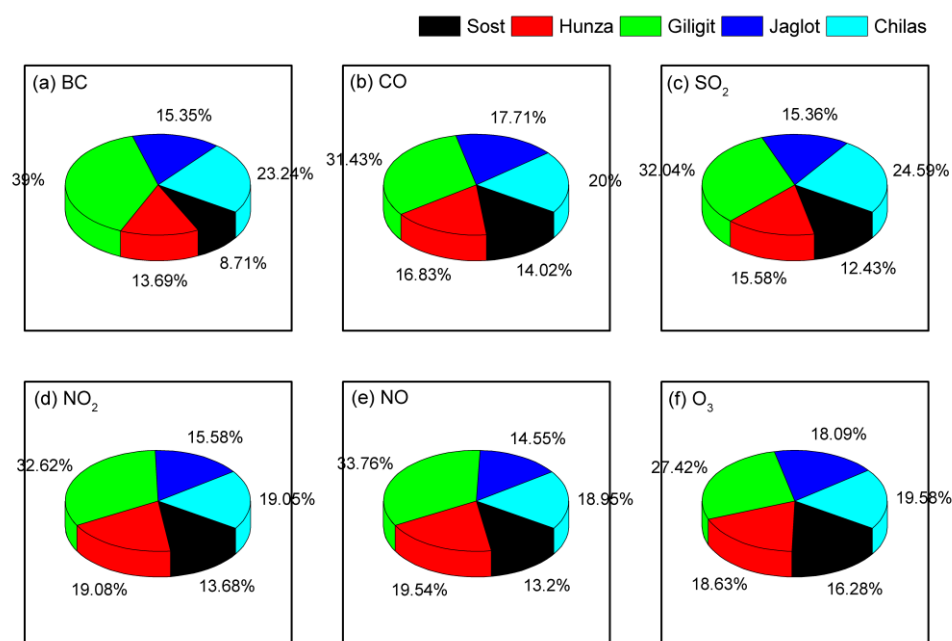

**Figure S1.** The daily average air quality indicators at all study sites during winter, 2019.

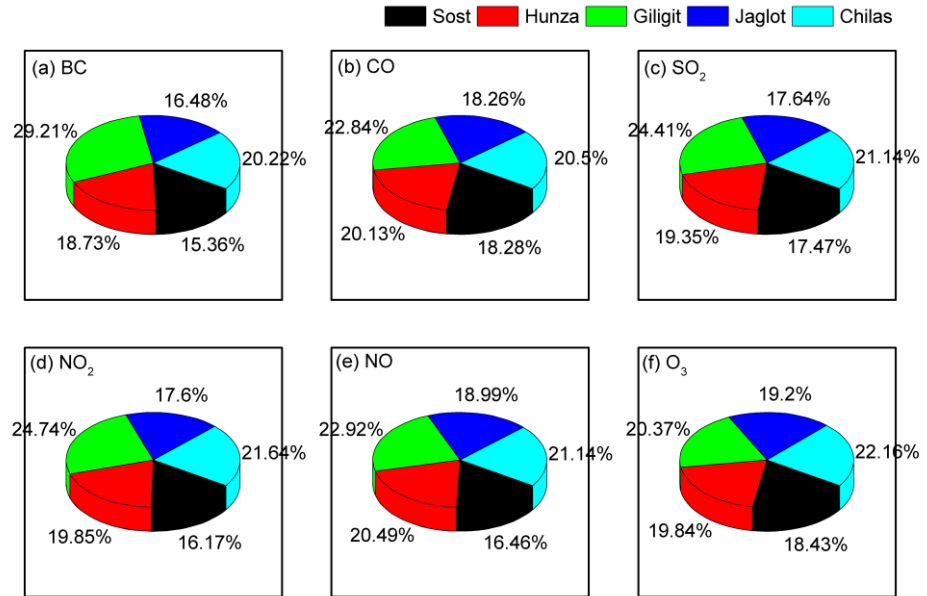

**Figure S2.** The daily average air quality indicators at all study sites during winter, 2019.

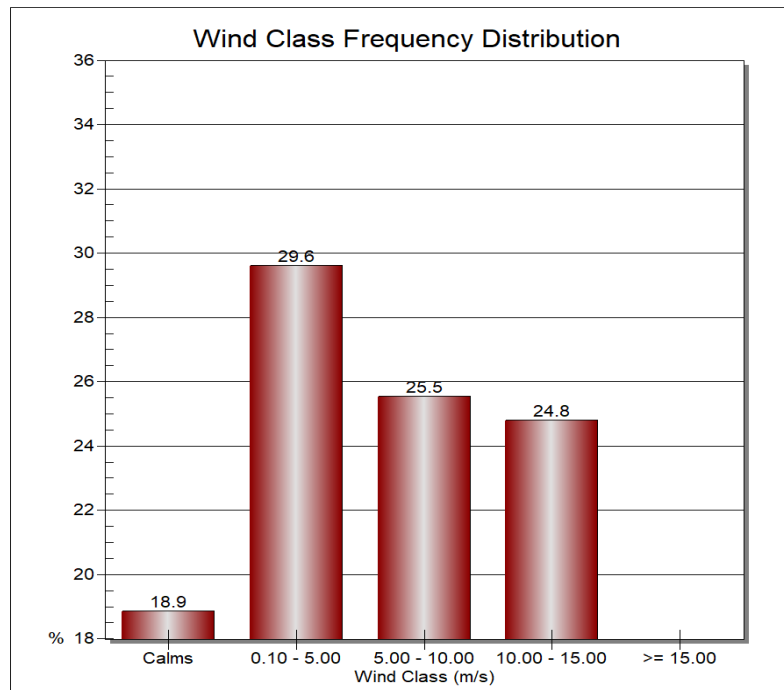

**Figure S3.** The graph of wind class frequency distribution at Sost, Hunza, Gilgit, Jaglot and Chilas.
